# Supplementary material for: Solid-State Synthesis of Cobalt/NCS Electrocatalyst for Oxygen Reduction Reaction in Dual Chamber Microbial Fuel Cells
Source: MDPI journal article supplement (doi:10.3390/nano12244369), 2022-12-07
Supplement: s1 [file s1]

## Supplementary Materials

### Details of the commercial GDL used as backing layers for both anodes and cathodes:

- SIGRACET® GDL BC 35 as gas diffusion layers (GDL).
- The specifications are as follows
- Type: solid (paper)
- Thickness: 325  $\mu\text{m}$
- Basic weight: 110  $\text{g}/\text{m}^2$
- Air permeability: 1.5  $\text{cm}^3/(\text{cm}^2 \cdot \text{s})$
- Through plane resistance:  $<15 \text{ m}\Omega \text{ cm}^2$
- Teflon (PTFE %) content: 30

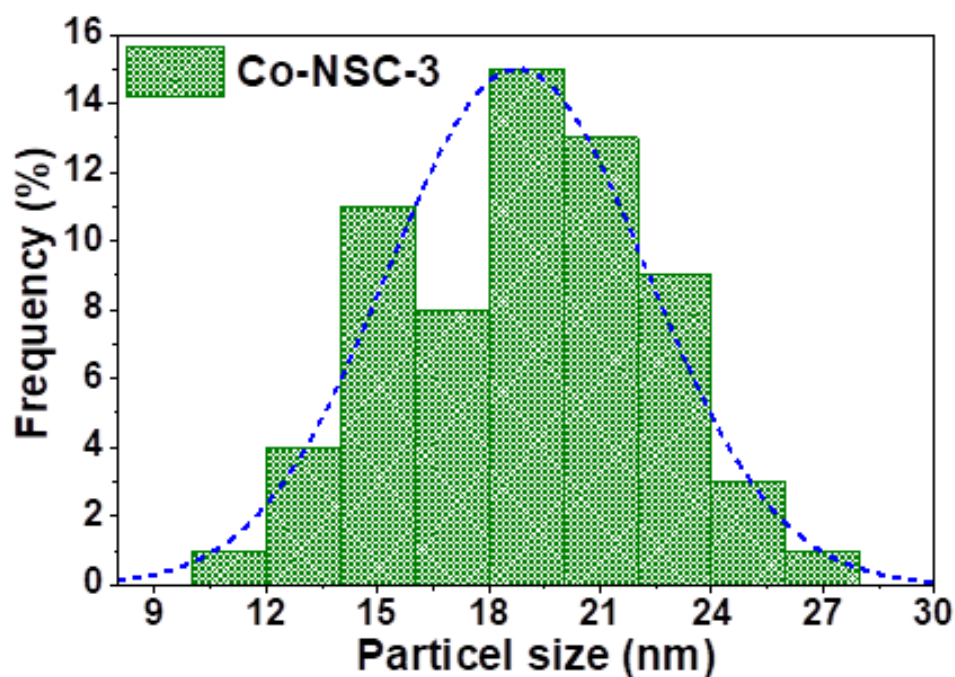

**Figure S1.** Particle size distribution of Co nanoparticle in Co-NSC-3 catalysts derived from the TEM images.



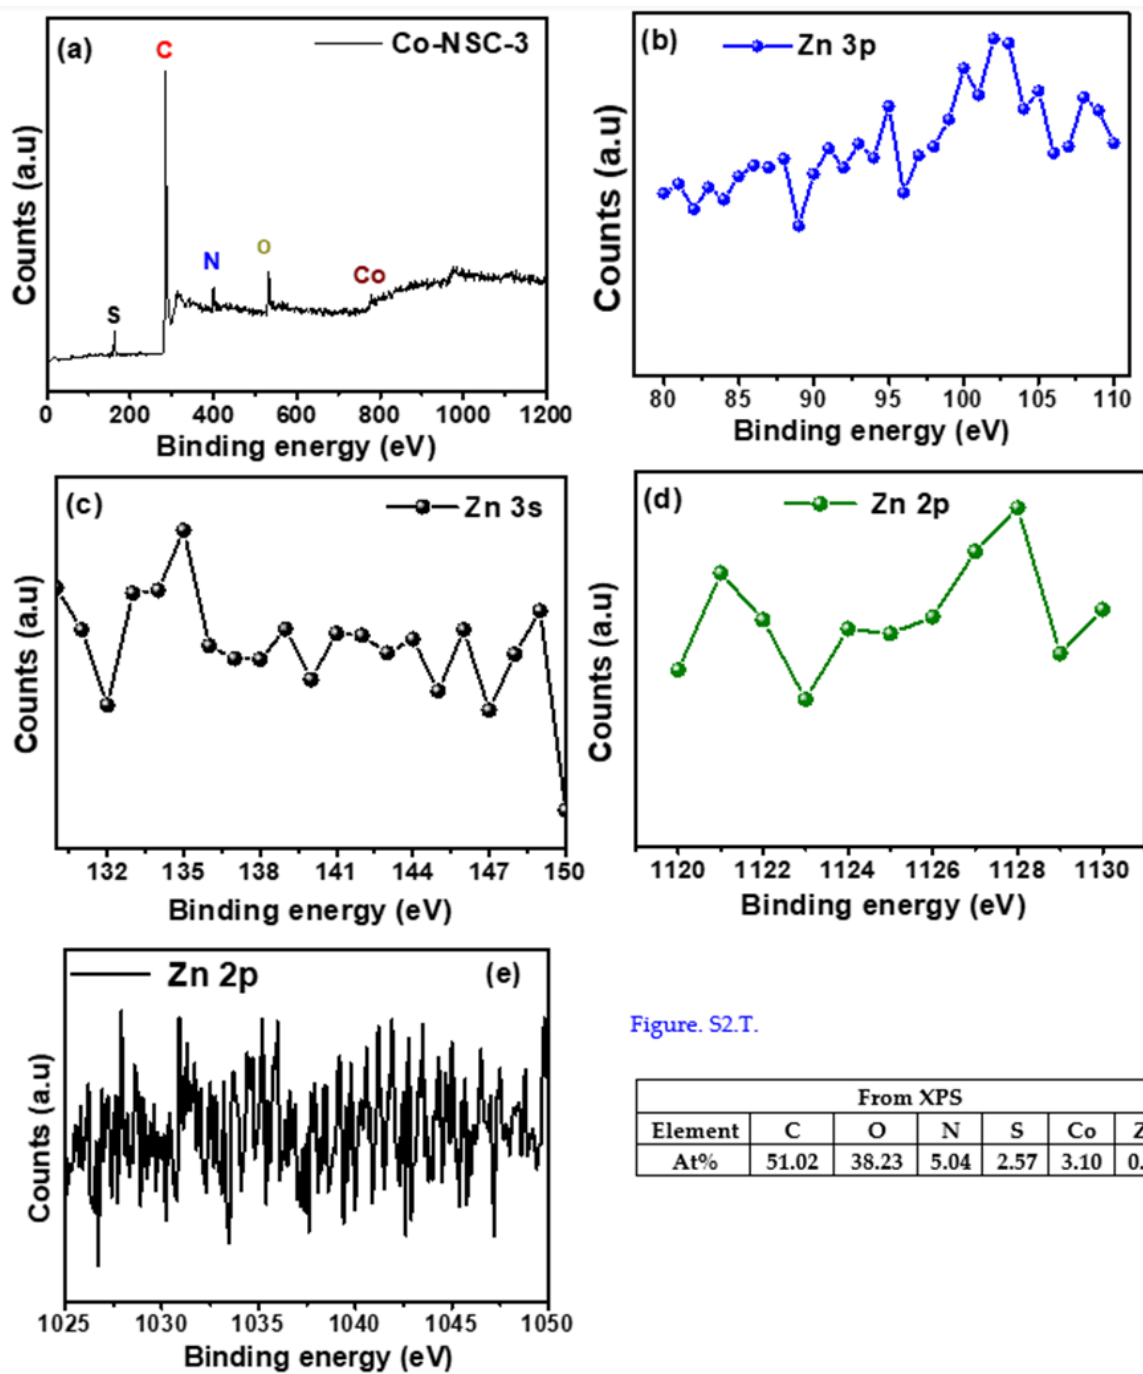

Figure. S2.T.

| From XPS |       |       |      |      |      |      |
|----------|-------|-------|------|------|------|------|
| Element  | C     | O     | N    | S    | Co   | Zn   |
| At%      | 51.02 | 38.23 | 5.04 | 2.57 | 3.10 | 0.04 |

Figure S2. (a) XPS survey spectrum for the Co-NSC-3 catalyst (b–d), survey scan of Zn 3p, 3s and 2p spectra, respectively. (e) Zn 2p high resolution scan. Figure. S2.T.



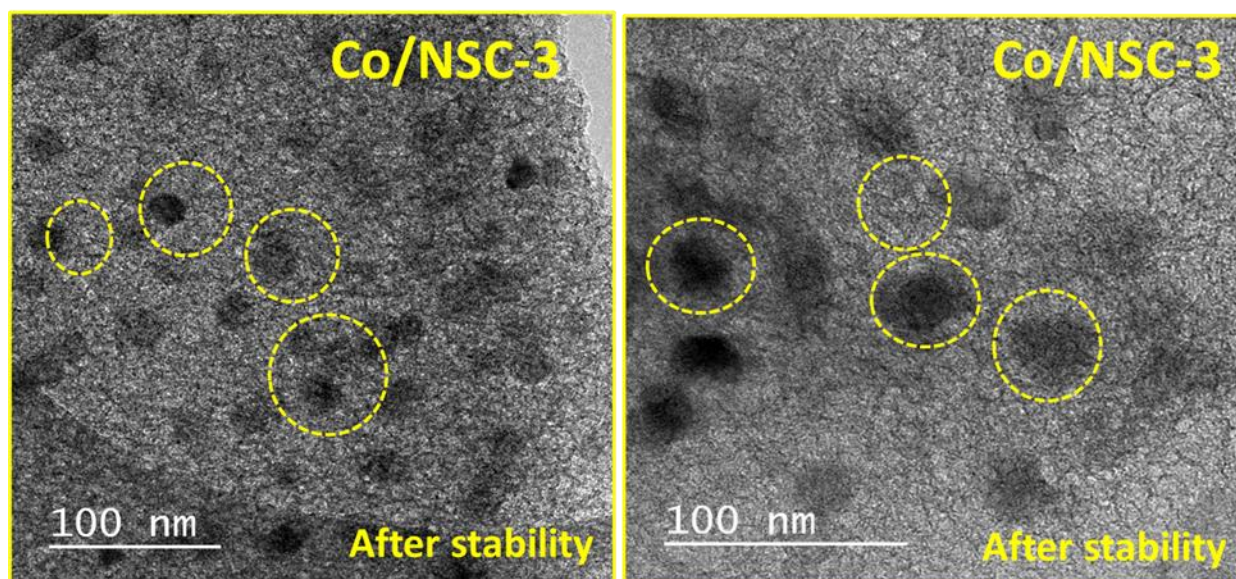

**Figure S3.** TEM images of Co/NSC-3 catalysts after stability test.
